# Supplementary material for: A pH-resistant Zn(ii) sensor derived from 4-aminonaphthalimide: design, synthesis and intracellular applications
Source: Royal Society of Chemistry journal article supplement (doi:10.1039/b500766f), 2005-01-01
Supplement: b500766f.pdf [file b500766f.pdf]

# Supporting information

## A pH-Resistant Zn(II) Sensor Derived from 4-Aminonaphthalimide: Design, Synthesis and Intracellular Applications

Jiaobing Wang,<sup>a</sup> Yi Xiao,<sup>a</sup> Zhichao Zhang,<sup>a</sup> Xuhong Qian,<sup>\*a,b</sup> Yuanyuan Yang, and Qin Xu

<sup>1</sup>H NMR spectra (in CDCl<sub>3</sub>, TMS as internal standard) of the compound **3**, **4**, **6**, and **WZS** in Scheme 1:

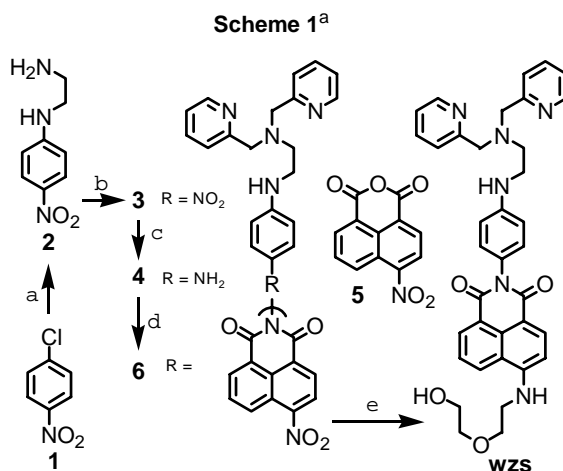

<sup>a</sup> Key: (a) ethane-1,2-diamine, acetonitrile; (b) 2-(chloromethyl)pyridine hydrochloride, N,N-diisopropylethylamine, acet-nitrile; (c) SnCl<sub>2</sub>, acetonitrile/ethanol; (d) 4-nitro-1,8-naphthalic anhydride **5**, acetic acid/ethanol, N<sub>2</sub>; (e) 2-(2-aminoethoxy)-ethanol, DMF.

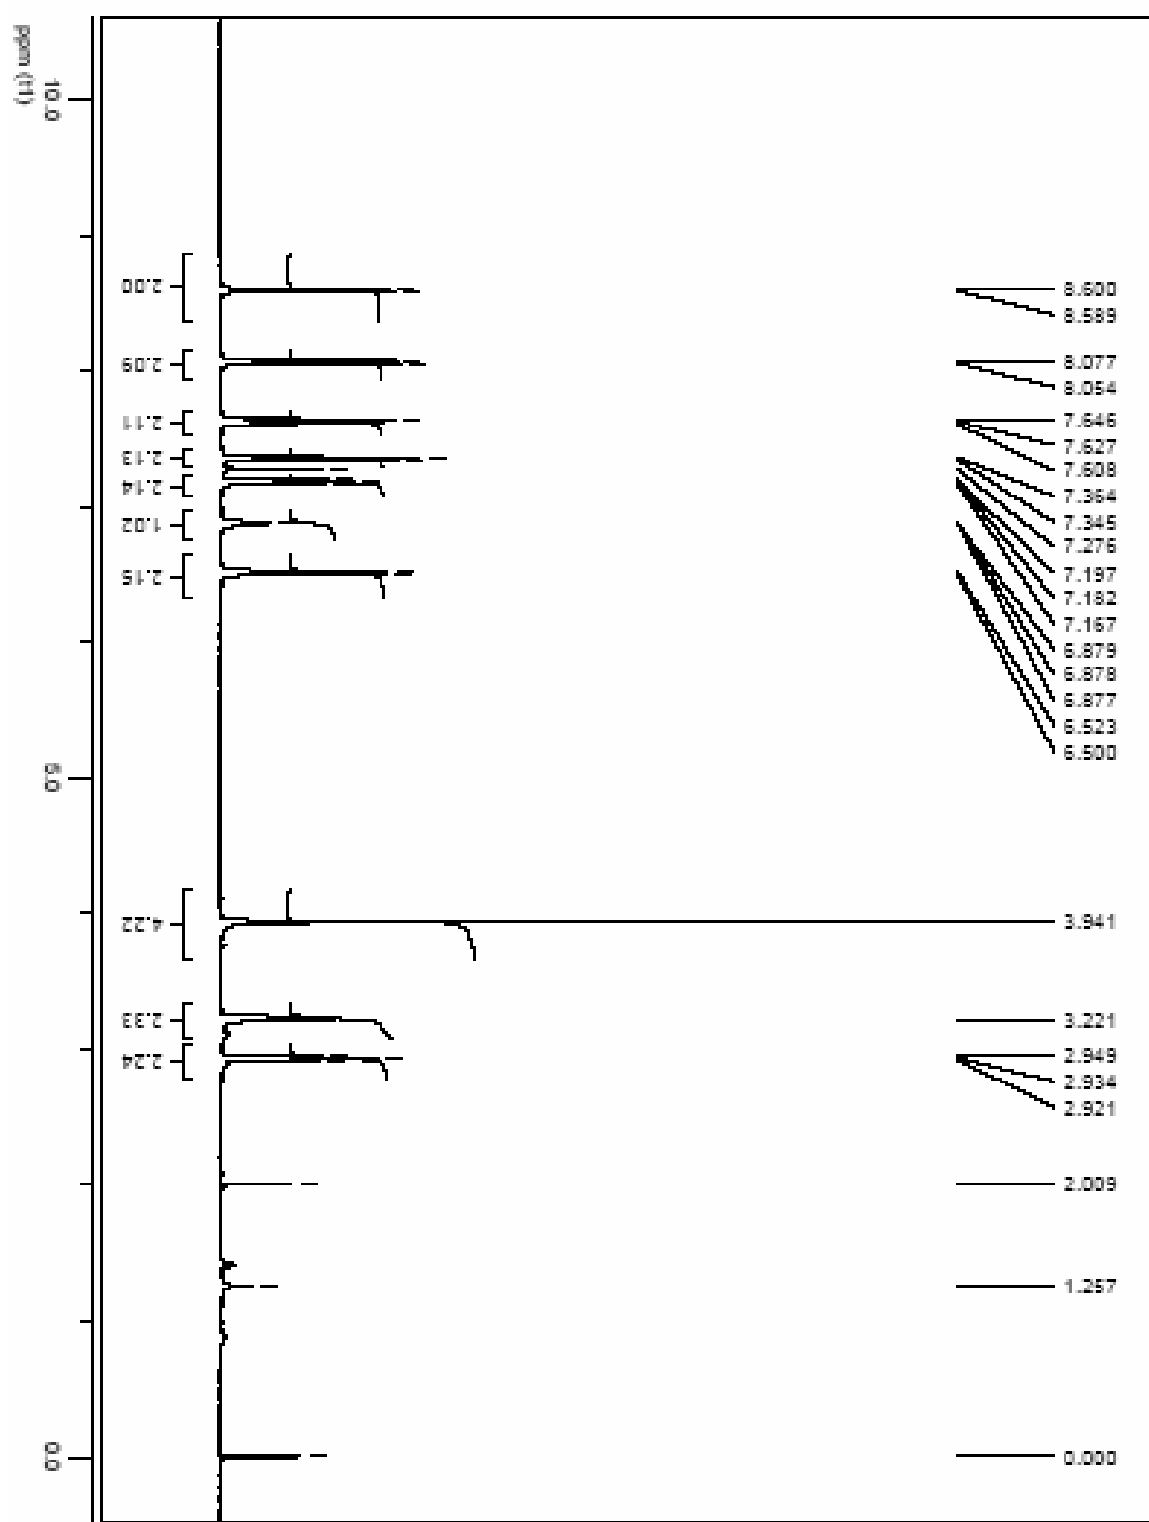

$^1\text{H}$  NMR spectra of the compound 3

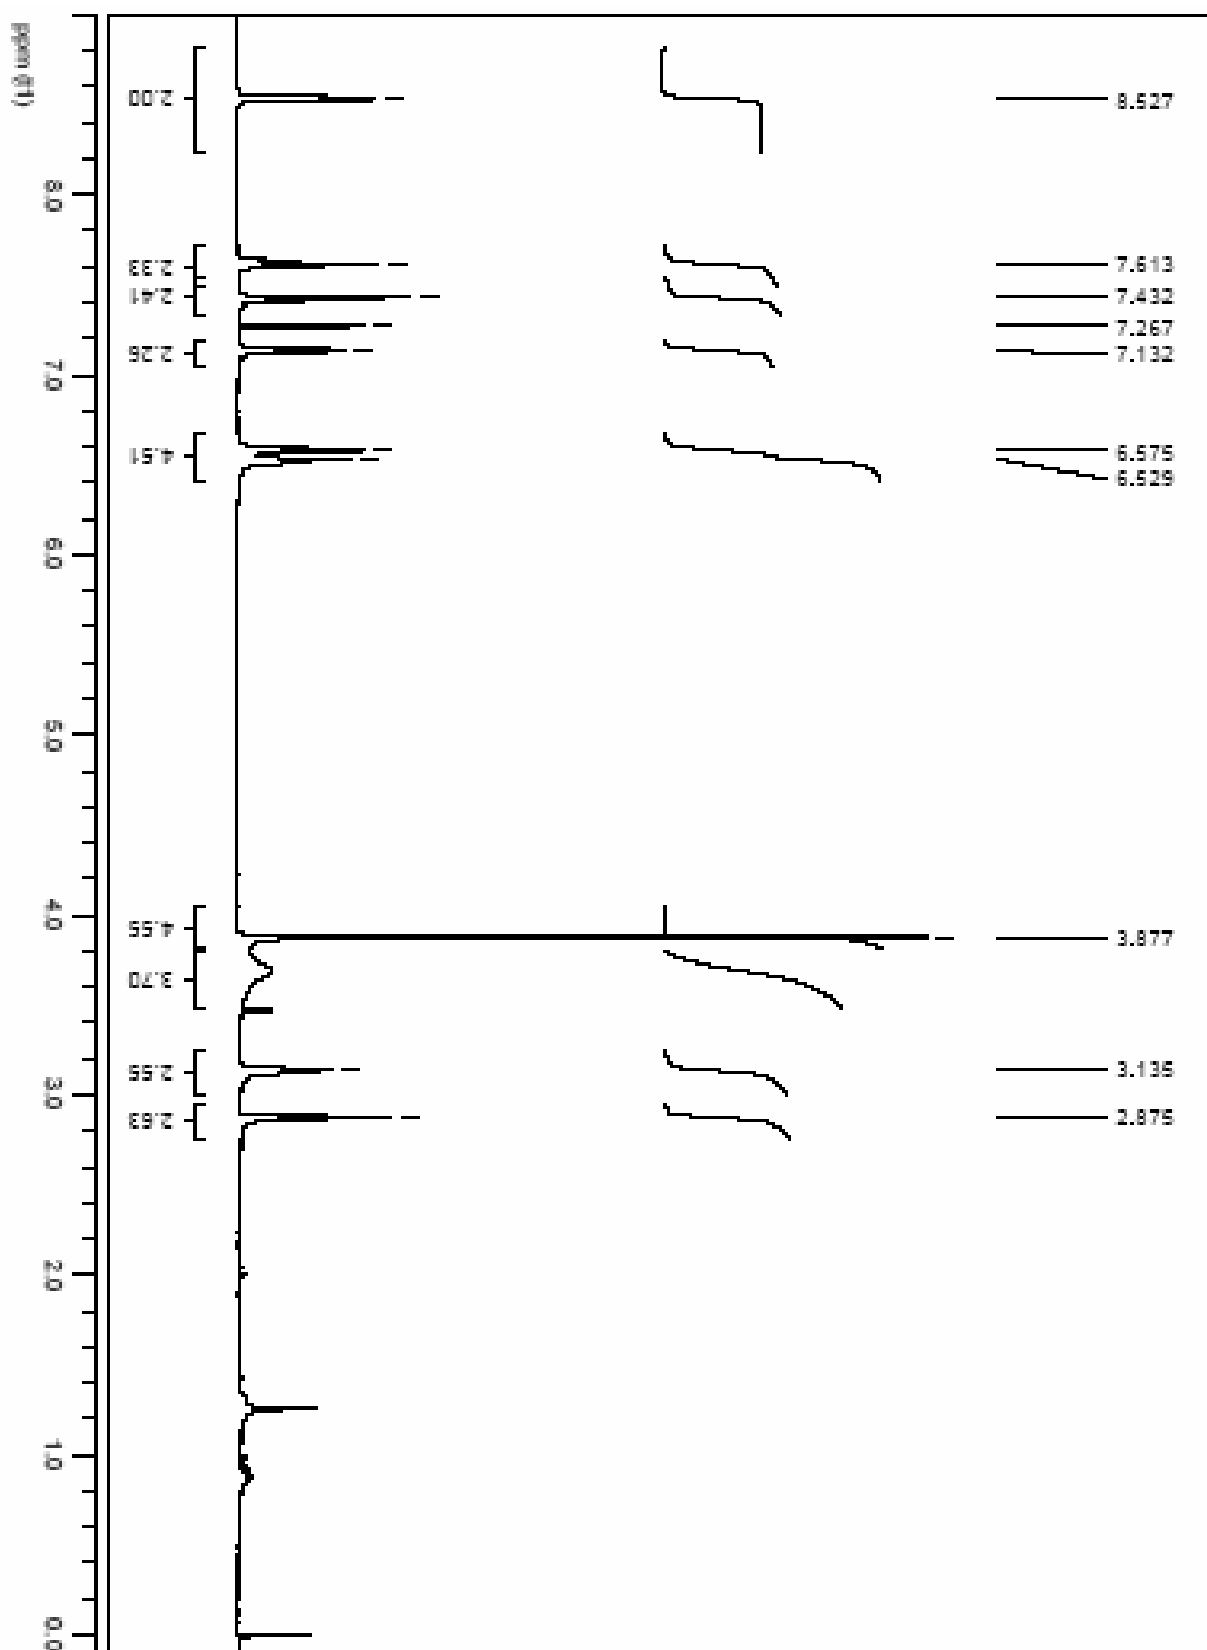

$^1\text{H}$  NMR spectra of the compound 4

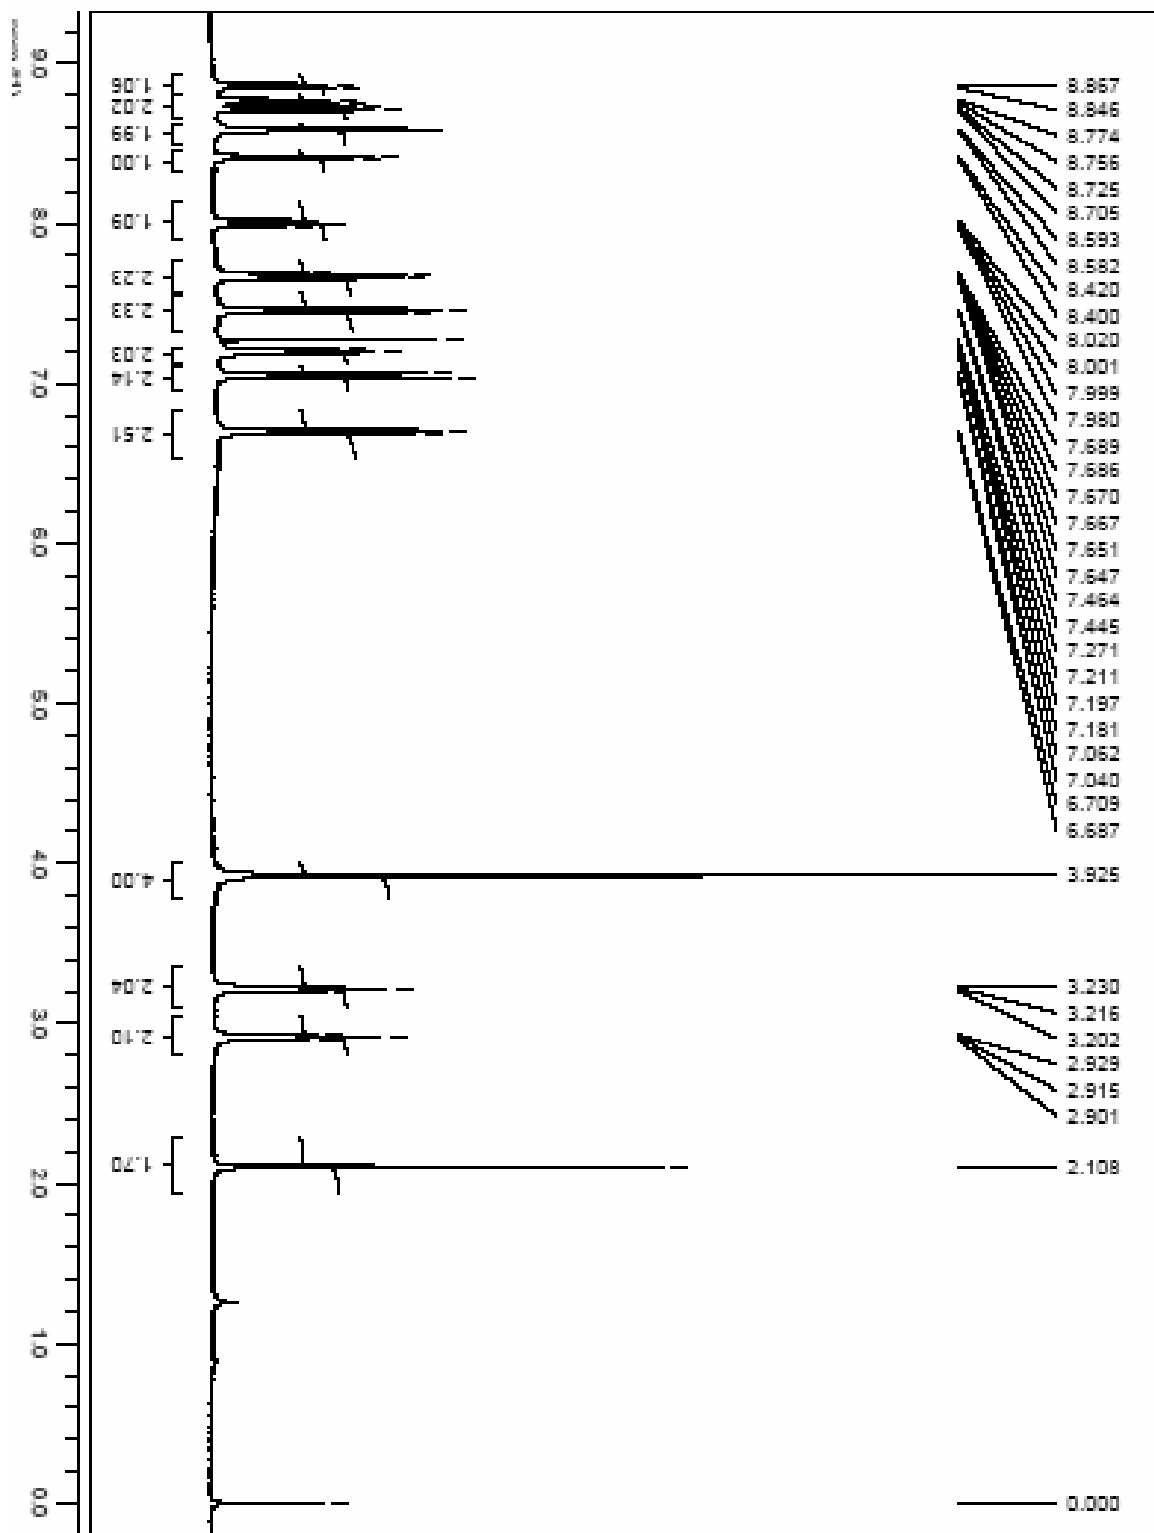

$^1\text{H}$  NMR spectra of the compound 6

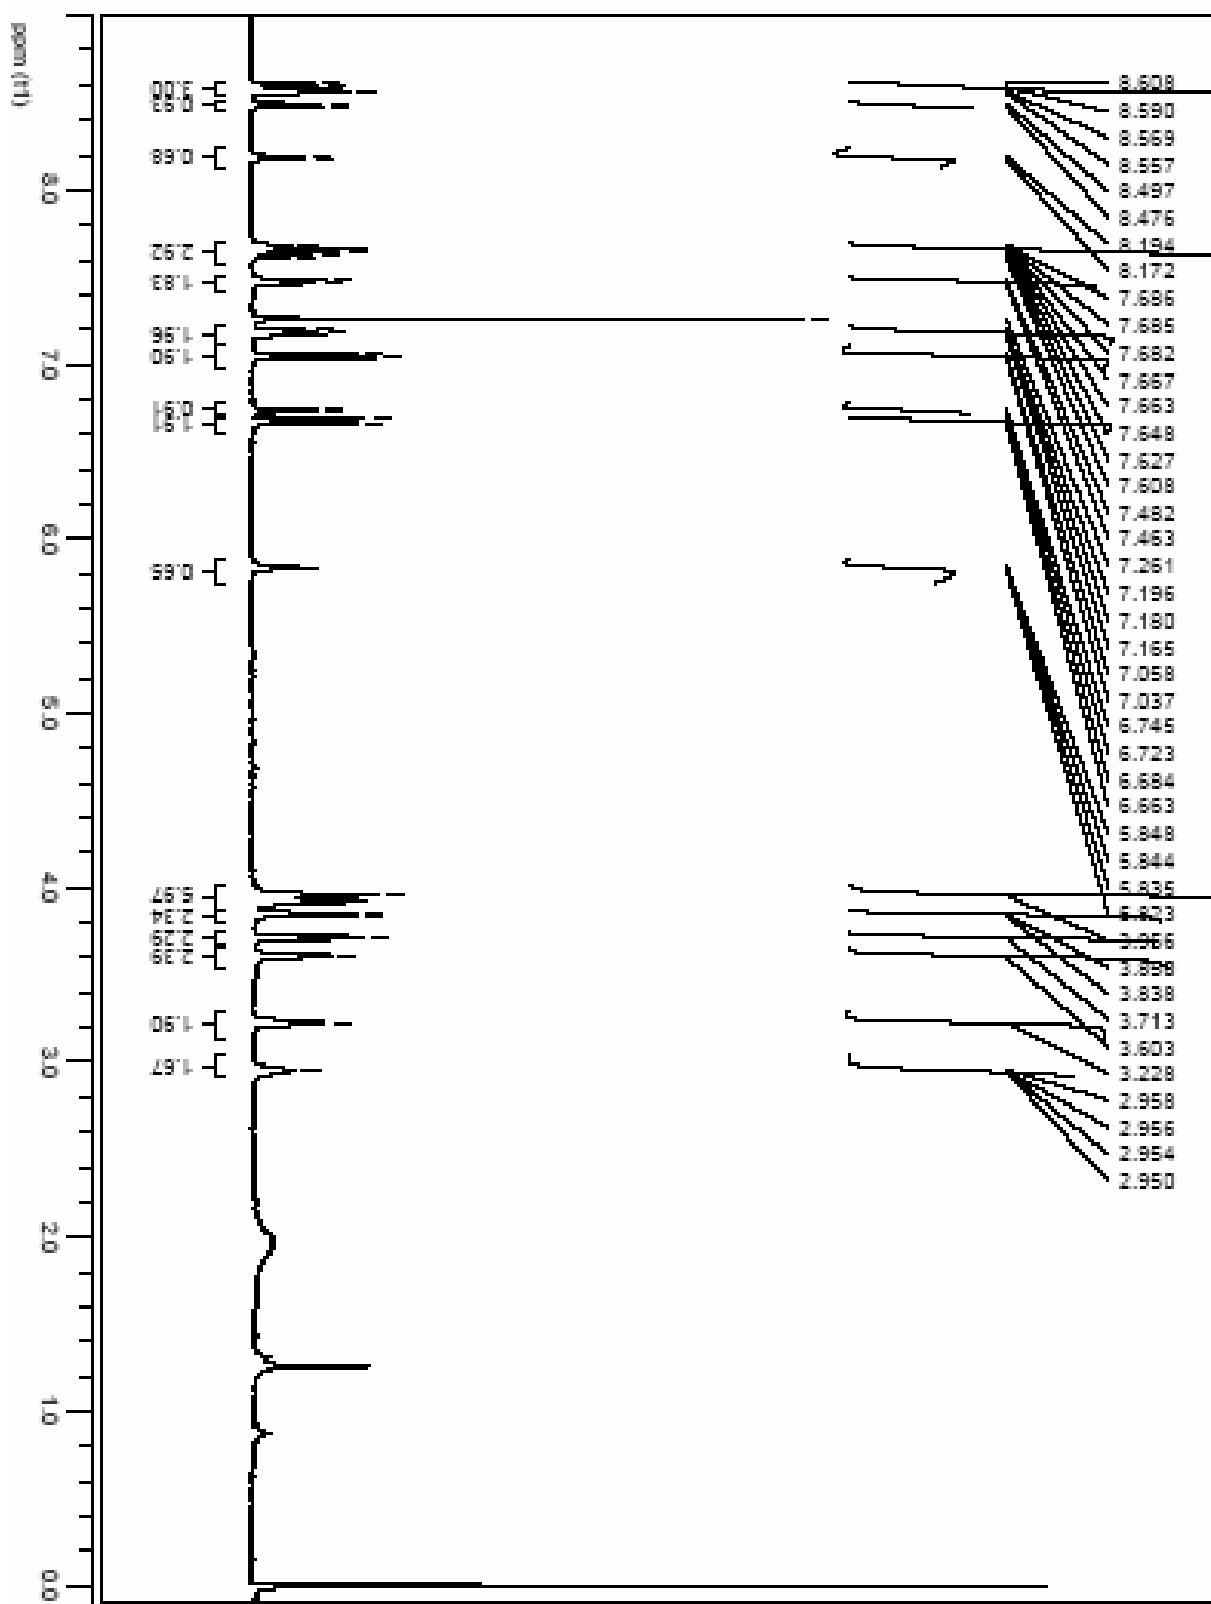

$^1\text{H}$  NMR spectra of the compound WZS
